# Supplementary material for: Factors associated with asthma among under-fives in Mulago hospital, Kampala Uganda: a cross sectional study
Source: PubMed Central journal article supplement (PMC3848829; doi:10.1186/1471-2431-13-141), 2013-09-11
Supplement: 1471-2431-13-141-S1.pdf [file 1471-2431-13-141-S1.pdf]

## 1. QUESTIONNAIRE

### Patient Identification

|                                      |                   |       |
|--------------------------------------|-------------------|-------|
| Date (dd/mm/yy)                      |                   |       |
| Study number                         |                   |       |
| Date of birth /age ( <i>months</i> ) |                   |       |
| Sex ( <i>Tick</i> )                  | Male              |       |
|                                      | Female            |       |
| Address                              | District          |       |
|                                      | Telephone contact |       |
| <i>Tick whichever is applicable</i>  | Urban             | Rural |

### PART I:

| A  | Your child's disease. How did it begin:                               | Yes | No | Don't Know |
|----|-----------------------------------------------------------------------|-----|----|------------|
| 1  | For how long has your child been sick? ( <b>days</b> )                |     |    |            |
| 2  | Did the disease start gradually over some days?                       |     |    |            |
| 3  | Did the disease start with cold or nose symptoms?                     |     |    |            |
| 4a | Did the disease specifically start with much cough? If yes,           |     |    |            |
| b  | i) Was the cough dry? <b>OR</b>                                       |     |    |            |
|    | ii) Was the cough wet/productive?                                     |     |    |            |
| 4c | Did the cough gradually worsen over some days?                        |     |    |            |
| 4d | Was the cough worse at night/early morning?                           |     |    |            |
| 5  | Did your child have chest pain?                                       |     |    |            |
| 6a | Did the disease specifically start with changes in breathing? If yes, |     |    |            |
| 6b | i) Difficulty in breathing?                                           |     |    |            |
|    | ii) Fast/rapid breathing?                                             |     |    |            |
|    | iii) Rattling/gurgling?                                               |     |    |            |

|   |                         |  |  |  |
|---|-------------------------|--|--|--|
|   | iv) Wheezing/whistling? |  |  |  |
|   | v) Shortness of breath? |  |  |  |
| 7 | Did he/she have fever?  |  |  |  |

| <b>B</b> | <b>Your child's disease today:</b> | Yes | No | Don't Know |
|----------|------------------------------------|-----|----|------------|
| 8        | Does your child have;              |     |    |            |
| 9a       | Cough? If yes,                     |     |    |            |
| 9b       | Is the cough dry <b>OR</b>         |     |    |            |
| 9c       | Is the cough wet/productive?       |     |    |            |
| 10       | Fast/rapid breathing?              |     |    |            |
| 11       | Difficulty in breathing?           |     |    |            |
| 12       | Wheezing/whistling?                |     |    |            |
| 13       | Rattling/gurgling?                 |     |    |            |
| 14       | Fever?                             |     |    |            |

| <b>C</b> | <b>In the last 3 months before coming to hospital, has your child:</b> | Yes | No | Don't Know |
|----------|------------------------------------------------------------------------|-----|----|------------|
| 15       | Had many colds?                                                        |     |    |            |
| 16a      | Been coughing most of the time? If yes,                                |     |    |            |
| 16b      | Coughed a lot in the night/early morning?                              |     |    |            |
| 16c      | Woken up from sleep because of coughing?                               |     |    |            |
| 17       | Had difficulty in breathing?                                           |     |    |            |
| 18       | Fast/rapid breathing?                                                  |     |    |            |
| 19       | Wheezing/whistling?                                                    |     |    |            |
| 20       | Rattling/gurgling?                                                     |     |    |            |
| 21       | Shortness of breath                                                    |     |    |            |

|     |                                                         |  |  |  |
|-----|---------------------------------------------------------|--|--|--|
| 22  | Chest pain                                              |  |  |  |
| 23a | Used any medicine because of cough? If yes,             |  |  |  |
| 23b | Salbutamol                                              |  |  |  |
| 23c | Steroids: Prednisolone, Dexamethasone, others (specify) |  |  |  |
| 23d | Cough syrups (specify)                                  |  |  |  |
| 23  | Antibiotics (specify)                                   |  |  |  |

| D   | Earlier problems (since birth):                                           | Yes          | No | Don't Know |
|-----|---------------------------------------------------------------------------|--------------|----|------------|
|     | Has your child had recurrent episodes of:                                 |              |    |            |
| 24a | Cough? If yes,                                                            |              |    |            |
| 24b | Is the cough mostly dry? <b>OR</b>                                        |              |    |            |
| 24c | Is the cough wet/productive?                                              |              |    |            |
| 24d | Does the cough usually occur in the night/early morning?                  |              |    |            |
| 24e | Does your child wake up because of cough?                                 |              |    |            |
| 25a | Difficulty in breathing? If yes,                                          |              |    |            |
| 25b | Did the difficulty in breathing usually occur in the night/early morning? |              |    |            |
| 25c | Did your child wake up because of difficulty in breathing?                |              |    |            |
| 26a | Wheezing/whistling? If yes,                                               |              |    |            |
| 26b | Did the wheezing usually occur in the night/early morning?                |              |    |            |
| 26c | Did your child wake up because of wheezing?                               |              |    |            |
| 27  | How old was your child when he/she started having cough problems?         | Years/months |    |            |
| 28  | Has your child been diagnosed with asthma before?                         |              |    |            |
| 29a | Has your child ever taken medicine for asthma or wheezing? If yes,        |              |    |            |
| 29b | Salbutamol(oral, nebulised, inhaler)                                      |              |    |            |
| 29c | Steroids(Prednisolone, Hydrocortisone, Dexamethasone, others-specify)     |              |    |            |

**PART II: FACTORS ASSOCIATED WITH ASTHMA**

|     |                                                                     |     |    |            |
|-----|---------------------------------------------------------------------|-----|----|------------|
| 30a | Does your child have/ever had any allergies? If yes,                | Yes | No | Don't Know |
| 30b | i) Allergic rhinitis?                                               |     |    |            |
|     | ii) Eczema?                                                         |     |    |            |
|     | iii) Allergic conjunctivitis?                                       |     |    |            |
|     | iv) Others (specify)                                                |     |    |            |
| 31  | Are there any family members who have/have ever had asthma? If yes, |     |    |            |
| 31b | i) Mother                                                           |     |    |            |
|     | ii) Father                                                          |     |    |            |
|     | iii) Siblings                                                       |     |    |            |
|     | iv) Other (specify)                                                 |     |    |            |
| 32a | Are there any family members who have/have had allergies? If yes    |     |    |            |
| 32b | i) Mother                                                           |     |    |            |
|     | ii) Father                                                          |     |    |            |
|     | iii) Siblings                                                       |     |    |            |
|     | iv) Other (specify)                                                 |     |    |            |

|  |                       |     |    |            |
|--|-----------------------|-----|----|------------|
|  | <b>Birth history:</b> | Yes | No | Don't Know |
|--|-----------------------|-----|----|------------|

|    |                   |                              |  |  |  |
|----|-------------------|------------------------------|--|--|--|
| 33 | Mode of delivery  | Spontaneous Vaginal Delivery |  |  |  |
|    |                   | Caesarean section            |  |  |  |
| 34 | Maturity of baby  |                              |  |  |  |
|    |                   | Pre-term                     |  |  |  |
|    |                   | Term                         |  |  |  |
|    |                   | Post-term                    |  |  |  |
| 35 | Birth weight (kg) |                              |  |  |  |
|    | i)                | ELBW (less than 1.5kg)       |  |  |  |
|    | ii)               | LBW (1.5 – 2.5kg)            |  |  |  |
|    | iii)              | Average (2.5 – 4.0kg)        |  |  |  |
|    | iv)               | Big baby (more than 4 kg)    |  |  |  |

|     | <b>Feeding:</b>                                                  | Yes | No | Don't Know |
|-----|------------------------------------------------------------------|-----|----|------------|
| 36a | Did your child ever breastfeed? If yes, <i>(if No, go to 37)</i> |     |    |            |
| 36b | For how long?                                                    |     |    |            |
|     | i) Still breastfeeding                                           |     |    |            |
|     | ii) < 3 months                                                   |     |    |            |
|     | iii) 3-6 months                                                  |     |    |            |
|     | iv) 6-12 months                                                  |     |    |            |
|     | v) > 12 months                                                   |     |    |            |
| 36c | For how long was your child exclusively breastfed?               |     |    |            |
|     | i) Still exclusively breastfeeding                               |     |    |            |
|     | ii) < 3 months                                                   |     |    |            |
|     | iii) 3-6 months                                                  |     |    |            |

|  | <b>Environment:</b> | Yes | No | Don't |
|--|---------------------|-----|----|-------|
|  |                     |     |    |       |

|     |                                                        |  |  | Know |
|-----|--------------------------------------------------------|--|--|------|
| 37a | How many people do live in your household?             |  |  |      |
| 37b | Do you have a carpet in your house? If yes, what type? |  |  |      |
|     | i) Woolen                                              |  |  |      |
|     | ii) Plastic                                            |  |  |      |
|     | iii) Others (specify)                                  |  |  |      |
| 37c | Do you have any rodents/pests in your house? If yes,   |  |  |      |
|     | i) Cockroaches                                         |  |  |      |
|     | ii) Mice                                               |  |  |      |
|     | iii) Other (specify)                                   |  |  |      |
| 37d | What do you use (fuel) for cooking?                    |  |  |      |
|     | i) Wood                                                |  |  |      |
|     | ii) Charcoal                                           |  |  |      |
|     | iii) Gas                                               |  |  |      |
|     | iv) Electricity                                        |  |  |      |
|     | v) Kerosene                                            |  |  |      |

|     | <b>Exposure to tobacco smoke:</b>               | Yes | No | Don't Know |
|-----|-------------------------------------------------|-----|----|------------|
| 38a | Is there any smoker at home? If yes, who?       |     |    |            |
| 38b | i) Mother                                       |     |    |            |
|     | ii) Father                                      |     |    |            |
|     | iii) Other (specify)                            |     |    |            |
| 38c | How much does he/she smoke?                     |     |    |            |
|     | i) Light (less than 5 sticks per day)           |     |    |            |
|     | ii) Moderate (5-20 sticks per day)              |     |    |            |
|     | iii) Heavy (more than 20 sticks per day)        |     |    |            |
| 38d | Does the child share a bedroom with the smoker? |     |    |            |

| 39 | Socioeconomic characteristics: Level of education of caretaker | Yes | No | Don't Know |
|----|----------------------------------------------------------------|-----|----|------------|
|    | i) No formal education                                         |     |    |            |
|    | ii) Primary                                                    |     |    |            |
|    | iii) Secondary                                                 |     |    |            |
|    | iv) Tertiary                                                   |     |    |            |

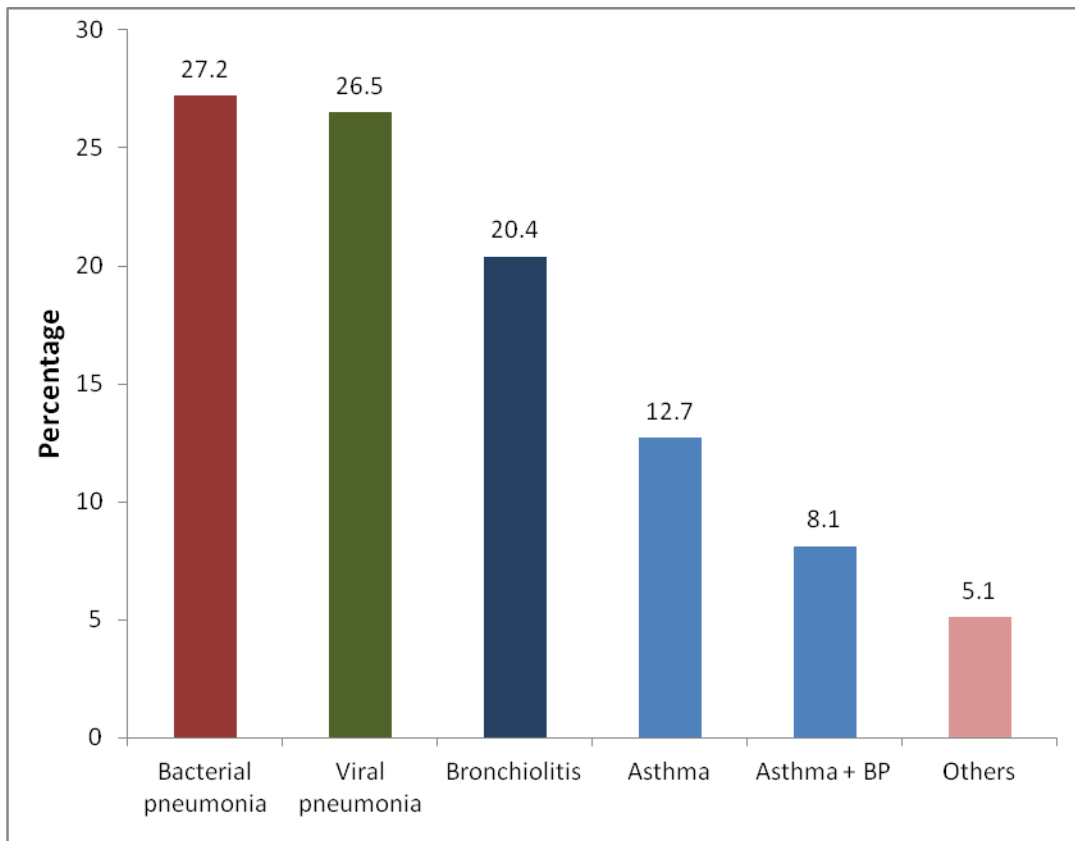

**BP: bacterial pneumonia** **Others included pulmonary tuberculosis and PCP.**
